# Supplementary material for: Development of an Effective and Stable Genotype-Matched Live Attenuated Newcastle Disease Virus Vaccine Based on a Novel Naturally Recombinant Malaysian Isolate Using Reverse Genetics
Source: MDPI journal article supplement (doi:10.3390/vaccines8020270), 2020-06-02
Supplement: s1 [file s1]

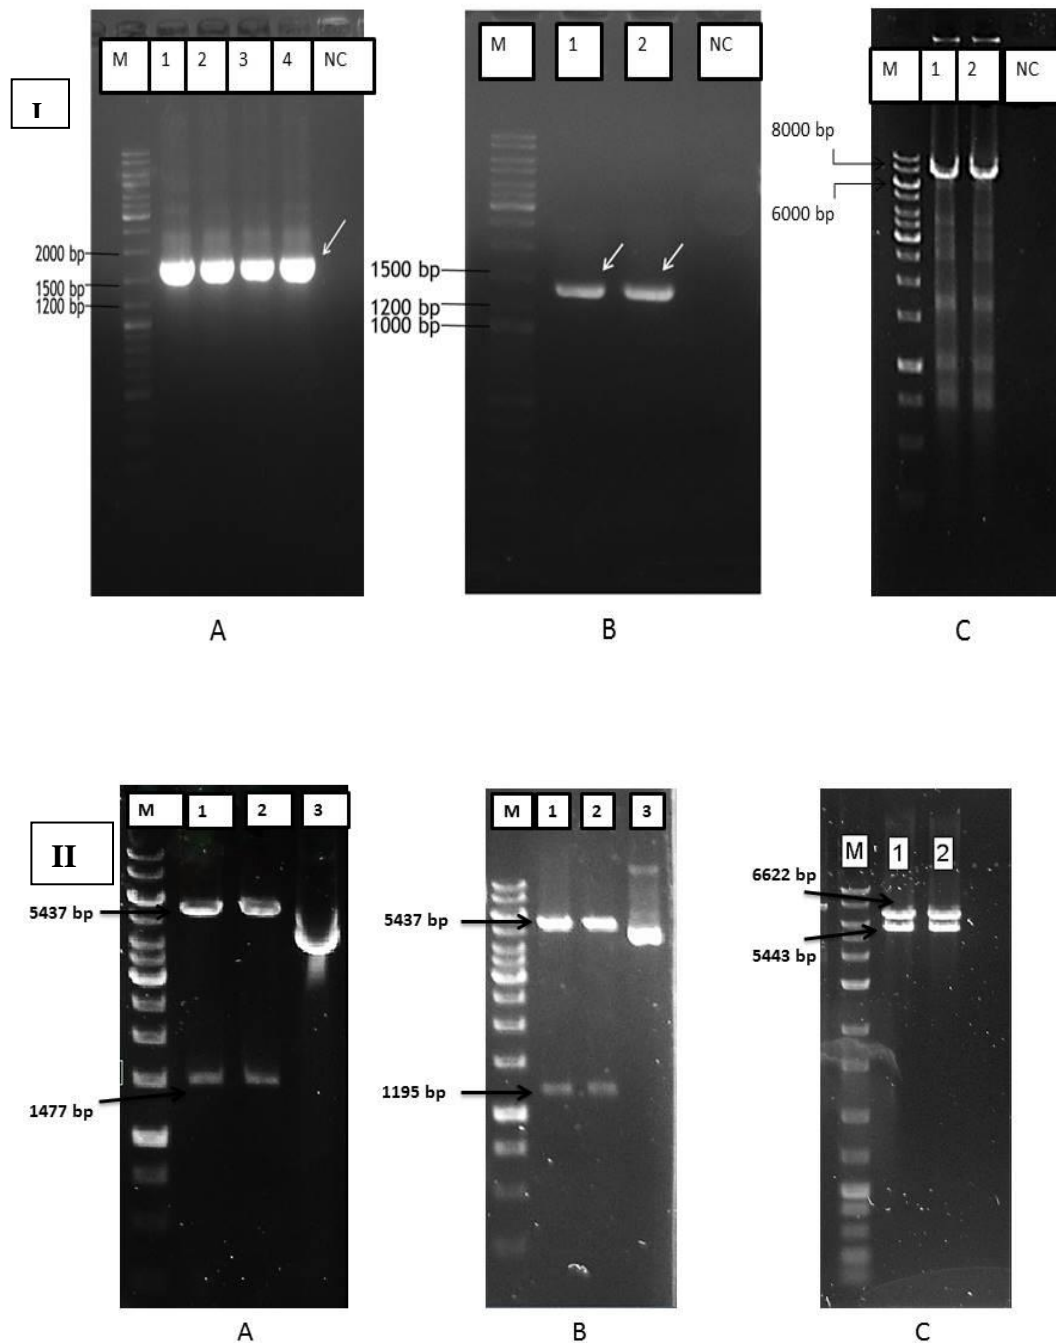

**Figure S1. Verification of helper plasmid constructs by colony PCR and restriction analysis.** IA, IB and IC respectively represent cloned NP coding region (1599 bp), Cloned f P gene (1317 bp) and Cloned L coding region (6750 bp) amplified using vector specific primers. IIA. Lanes 1 and 2 represent pCIneo-NP constructs digested with *EcoRI* and *NotI*. Lane 3 is the undigested plasmid construct. IIB Lanes 1 and 2 are pCIneo-P construct cut with *EcoRI* and *NotI*. Lane 3 is undigested pCIneo-P construct. (C) pCIneo-L constructs digested with *MluI* and *NotI* flanking the L coding region in the construct. M represents 1kb ladder.
